# Supplementary material
Source: publisher figshare collection journal article supplement (https://tandf.figshare.com/ndownloader/files/20590500)
Supplement: Supplementary file 1 [file 20590500]

| Strain name | References |
| --- | --- |
| *Akkermansia muciniphila* | (Korpela et al. 2018) |
| *Alistipes sp.* | (Korpela et al. 2018) |
| *Alistipes onderdonkii* | (Ferretti et al. 2018) |
| *Alistipes putredinis* | (Nayfach et al. 2016; Ferretti et al. 2018) |
| *Alistipes senegalensis* | (Ferretti et al. 2018) |
| *Alistipes shahii* | (Korpela et al. 2018; Ferretti et al. 2018) |
| *Bacteroides caccae* | (Nayfach et al. 2016; Ferretti et al. 2018) (Korpela et al. 2018) |
| *Bacteroides cellulosilyticus* | (Nayfach et al. 2016) |
| *Bacteroides dorei* | (Yassour et al. 2018; Ferretti et al. 2018; Wampach et al. 2018) |
| *Bacteroides eggerthii* | (Korpela et al. 2018) |
| *Bacteroides faecis* | (Ferretti et al. 2018) |
| *Bacteroides finegoldii* | (Korpela et al. 2018; Ferretti et al. 2018) |
| *Bacteroides fragilis* | (Nayfach et al. 2016; Korpela et al. 2018) |
| *Bacteroides intestinalis* | (Ferretti et al. 2018) |
| *Bacteroides ovatus* | (Nayfach et al. 2016; Ferretti et al. 2018) |
| *Bacteroides plebeius* | (Ferretti et al. 2018) |
| *Bacteroides salanitronis* | (Ferretti et al. 2018) |
| *Bacteroides stecoris* | (Nayfach et al. 2016; Korpela et al. 2018) |
| *Bacteroides thetaiotamicron* | (Nayfach et al. 2016) |
| *Bacteroides uniformis* | (Nayfach et al. 2016; Yassour et al. 2018; Ferretti et al. 2018; Wampach et al. 2018) |
| *Bacteroides vulgatus* | (Nayfach et al. 2016; Yassour et al. 2018; Ferretti et al. 2018) |
| *Barnesiella intestinihominis* | (Ferretti et al. 2018) |
| *Bifidobacterium catenulatum* | (Duranti et al. 2017) |
| *Bifidobacterium pseudocatenulatum* | (Nayfach et al. 2016; Duranti et al. 2017; Korpela et al. 2018; Wampach et al. 2018) |
| *Blautia wexlerae* | (Nayfach et al. 2016) |
| *Collinsella aerofaciens* | (Korpela et al. 2018) |
| *Coprococcus comes* | (Asnicar et al. 2017) |
| *Dialister invisus* | (Korpela et al. 2018) |
| *Dorea formicigenerans* | (Korpela et al. 2018) |
| *Eggerthella* | (Wampach et al. 2018) |
| *Eschericia coli* | (Nayfach et al. 2016; Yassour et al. 2018; Ferretti et al. 2018) |
| *Eubacterium eligens* | (Nayfach et al. 2016; Ferretti et al. 2018) |
| *Eubacterium rectale* | (Nayfach et al. 2016; Ferretti et al. 2018) |
| *Faecalibacterium prausnitzii* | (Nayfach et al. 2016; Ferretti et al. 2018) |
| *Haemophilus sputorum* | (Ferretti et al. 2018) |
| *Lactobacillus casei* | (Albesharat et al. 2011; Jost et al. 2014) |
| *Odoribacter splanchnicus* | (Ferretti et al. 2018) |
| *Parabacteroides distasonis* | (Nayfach et al. 2016; Ferretti et al. 2018) |
| *Parabacteroides merdae* | (Nayfach et al. 2016) |
| *Prevotella copri* | (Korpela et al. 2018) |
| *Ruminococcus* | (Wampach et al. 2018) |
| *Ruminococcus bromii* | (Asnicar et al. 2017; Ferretti et al. 2018) |
| *Ruminococcus gnavus* | (Korpela et al. 2018) |
| *Staphylococcus massiliensis* | (Ferretti et al. 2018) |
| *Streptococcus lutetiensis* | (Albesharat et al. 2011) |
| *Sutterella wadsworthensis* | (Ferretti et al. 2018) |

Supplementary table 1: The detailed overview of the identical strains detected in maternal feces and infant feces that were not shared in a human milk source. Sharing identical strains between the intestinal microbiota of mother and child support the hypothesis of maternal to child transmission of microbiota. The underlying mechanism of transmission are still under debate as human milk could be a possible intermediate transmission but for these strains no human milk data supports that hypothesis. This detailed information is summarized in Figure 2A as part of the strain transmission between mother and child.

References:

Albesharat R, Ehrmann MA, Korakli M, Yazaji S, Vogel RF. 2011. Phenotypic and genotypic analyses of lactic acid bacteria in local fermented food, breast milk and faeces of mothers and their babies. Syst Appl Microbiol [Internet]. [cited 2018 Jan 23]; 34:148–155. Available from: http://www.sciencedirect.com/science/article/pii/S0723202011000075

Asnicar F, Manara S, Zolfo M, Truong DT, Scholz M, Armanini F, Ferretti P, Gorfer V, Pedrotti A, Tett A, Segata N. 2017. Studying Vertical Microbiome Transmission from Mothers to Infants by Strain-Level Metagenomic Profiling. mSystems [Internet]. [cited 2017 Apr 12]; 2. Available from: http://msystems.asm.org/content/2/1/e00164-16

Duranti S, Lugli GA, Mancabelli L, Armanini F, Turroni F, James K, Ferretti P, Gorfer V, Ferrario C, Milani C, et al. 2017. Maternal inheritance of bifidobacterial communities and bifidophages in infants through vertical transmission. Microbiome [Internet]. [cited 2017 Jul 4]; 5:66. Available from: http://microbiomejournal.biomedcentral.com/articles/10.1186/s40168-017-0282-6

Ferretti P, Pasolli E, Tett A, Asnicar F, Gorfer V, Fedi S, Armanini F, Truong DT, Manara S, Zolfo M, et al. 2018. Mother-to-Infant Microbial Transmission from Different Body Sites Shapes the Developing Infant Gut Microbiome. Cell Host Microbe [Internet]. [cited 2019 Jan 14]; 24:133-145.e5. Available from: https://www.sciencedirect.com/science/article/pii/S1931312818303172

Jost T, Lacroix C, Braegger C, Rochat F, Chassard C. 2014. Vertical mother-neonate transfer of maternal gut bacteria via breastfeeding. Environ Microbiol [Internet]. [cited 2018 Jan 7]; 16:2891–2904. Available from: http://doi.wiley.com/10.1111/1462-2920.12238

Korpela K, Costea P, Pedro Coelho L, Kandels-Lewis S, Boomsma DI, Segata N, Bork P. 2018. Selective maternal seeding and environment shape the human gut microbiome Running title: Maternal seeding of the human gut microbiome [Internet]. [cited 2018 Mar 14]:561–568. Available from: https://genome.cshlp.org/content/early/2018/03/01/gr.233940.117.full.pdf

Nayfach S, Rodriguez-Mueller B, Garud N, Pollard KS. 2016. An integrated metagenomics pipeline for strain profiling reveals novel patterns of bacterial transmission and biogeography. Genome Res [Internet]. [cited 2018 Jan 26]; 26:1612–1625. Available from: http://www.ncbi.nlm.nih.gov/pubmed/27803195

Wampach L, Heintz-Buschart A, Fritz J V., Ramiro-Garcia J, Habier J, Herold M, Narayanasamy S, Kaysen A, Hogan AH, Bindl L, et al. 2018. Birth mode is associated with earliest strain-conferred gut microbiome functions and immunostimulatory potential. Nat Commun [Internet]. [cited 2018 Dec 10]; 9:5091. Available from: http://www.nature.com/articles/s41467-018-07631-x

Yassour M, Jason E, Hogstrom LJ, Huttenhower C, Knip M, Correspondence RJX. 2018. Strain-Level Analysis of Mother-to-Child Bacterial Transmission during the First Few Months of Life. Cell Host Microbe [Internet]. [cited 2018 Oct 11]; 24:146–154. Available from: https://doi.org/10.1016/j.chom.2018.06.007
